# Supplementary material for: Well-defined phosphino-phenolate neutral nickel(ii) catalysts for efficient (co)polymerization of norbornene and ethylene
Source: Royal Society of Chemistry journal article supplement (doi:10.1039/c5dt00074b), 2015-01-01

## Supporting information

### Well-defined Phosphino-phenolate Neutral Nickel(II) Catalysts for Efficient (Co)polymerization of Norbornene and Ethylene

Yan-Ping Zhang,<sup>1,2</sup> Wei-Wei Li,<sup>1,2</sup> Bai-Xiang Li,<sup>1</sup> Hong-Liang Mu,<sup>\*,1</sup> Yuesheng Li<sup>\*,1,3</sup>

<sup>1</sup> State Key Laboratory of Polymer Physics and Chemistry, Changchun Institute of Applied Chemistry, Chinese Academy of Sciences, Changchun 130022, China

<sup>2</sup> University of the Chinese Academy of Sciences, Changchun Branch, Changchun 130022, China

<sup>3</sup> School of Material Science and Engineering, Tianjin University, Tianjin 300072, China

#### CONTENTS

**Table S1.** Crystal data and structure refinements of complexes **1**, **2**, **4**, **5**, **3-OH** and **3-Bis**

**Figure S1.** GPC spectra of NB/NBC copolymers obtained by complex **2**

**Figure S2.** TGA curves of NB/NBA copolymers obtained by complex **2**

**Figure S3.** FTIR Spectra of NB/NBM copolymers obtained by complex **2**

**Figure S4.** <sup>13</sup>C-NMR spectrum of the ethylene oligomers produced by salicylaldimine nickel complex **5**

**Figure S5.** <sup>1</sup>H NMR of pyridine/B(C<sub>6</sub>F<sub>5</sub>)<sub>3</sub> adduct in C<sub>6</sub>D<sub>6</sub>

**Figure S6.** <sup>1</sup>H NMR spectrum of the mixture of complex **2** + the first nickel methyl species reacts with 400 equiv norbornene

**Figure S7.** <sup>1</sup>H NMR spectra of complex **2** + 4 equiv B(C<sub>6</sub>F<sub>5</sub>)<sub>3</sub> + 20 equiv NBC

\* Corresponding Author. E-mail: [muhongliang@ciac.ac.cn](mailto:muhongliang@ciac.ac.cn), [ysli@tju.edu.cn](mailto:ysli@tju.edu.cn).

**Figure S8.**  $^1\text{H}$  NMR spectra of a mixture of bisligated complex **4** with 6 equiv  $\text{B}(\text{C}_6\text{F}_5)_3$

**Figure S9.**  $^{19}\text{F}$  NMR spectrum of the low molecular weight polynorbornene prepared in the presence of ethylene using complex **1**/  $\text{B}(\text{C}_6\text{F}_5)_3$  system

**Determination of reactivity ratios of NB and NBC using complex **1** + 4 equiv  $\text{B}(\text{C}_6\text{F}_5)_3$**

**Table S1.** Crystal data and structure refinements of complexes **1**, **2**, **4**, **5**, **3-OH** and **3-Bis**.

|                                      | <b>1</b>                              | <b>2</b>                                            | <b>4</b>                                                        | <b>5</b>                                           | <b>3-OH</b>                                         | <b>3-Bis</b>                                                    |
|--------------------------------------|---------------------------------------|-----------------------------------------------------|-----------------------------------------------------------------|----------------------------------------------------|-----------------------------------------------------|-----------------------------------------------------------------|
| Formula                              | C <sub>28</sub> H <sub>30</sub> NNiOP | C <sub>30</sub> H <sub>21</sub> NONiPF <sub>5</sub> | C <sub>51</sub> H <sub>52</sub> NiO <sub>2</sub> P <sub>2</sub> | C <sub>29</sub> H <sub>38</sub> N <sub>2</sub> ONi | C <sub>25</sub> H <sub>32</sub> NO <sub>2</sub> NiP | C <sub>40</sub> H <sub>52</sub> NiO <sub>2</sub> P <sub>2</sub> |
| Formula weight                       | 486.21                                | 596.16                                              | 817.58                                                          | 489.32                                             | 468.20                                              | 685.47                                                          |
| Crystal system                       | monoclinic                            | monoclinic                                          | monoclinic                                                      | triclinic                                          | monoclinic                                          | triclinic                                                       |
| Space group                          | P <sub>21</sub> /n                    | P <sub>21</sub> /n                                  | P2/C                                                            | P <sup>-1</sup>                                    | C <sub>2</sub> /c                                   | P <sup>-1</sup>                                                 |
| a (Å)                                | 10.4122(7)                            | 14.0396(13)                                         | 13.2453(9)                                                      | 8.7278(6)                                          | 31.683(3)                                           | 12.9127(13)                                                     |
| b (Å)                                | 39.269(2)                             | 13.6829(13)                                         | 11.7477(8)                                                      | 11.8643(9)                                         | 10.7807(10)                                         | 13.303(2)                                                       |
| c (Å)                                | 12.1425(8)                            | 14.8362(14)                                         | 15.6869(8)                                                      | 13.9859(10)                                        | 16.0669(15)                                         | 13.3881(13)                                                     |
| α (°)                                | 90.00                                 | 90.00                                               | 90.00                                                           | 94.9720(10)                                        | 90.00                                               | 98.806(2)                                                       |
| β (°)                                | 90.9940(10)                           | 111.474(2)                                          | 119.710(4)                                                      | 99.1800(10)                                        | 115.753(2)                                          | 114.932(2)                                                      |
| γ (°)                                | 90.00                                 | 90.00                                               | 90.00                                                           | 108.4000(10)                                       | 90.00                                               | 107.871(2)                                                      |
| V (Å <sup>3</sup> ), Z               | 4964.1(6), 8                          | 2652.2(4), 4                                        | 2120.0(2), 2                                                    | 1342.00(17), 2                                     | 4942.8(8), 8                                        | 1875.6(4), 2                                                    |
| Density (Mg/m <sup>3</sup> )         | 1.301                                 | 1.493                                               | 1.281                                                           | 1.211                                              | 1.258                                               | 1.214                                                           |
| Absorpt. Coeff. (mm <sup>-1</sup> )  | 0.866                                 | 0.852                                               | 0.573                                                           | 0.745                                              | 0.869                                               | 0.634                                                           |
| F (000)                              | 2048                                  | 1216                                                | 864                                                             | 524                                                | 1984                                                | 732                                                             |
| θ range (°)                          | 1.76 to 25.04                         | 1.71 to 26.03                                       | 1.73 to 26.04                                                   | 1.49 to 26.03                                      | 2.02 to 25.05                                       | 1.70 to 26.03                                                   |
| Reflect. collected                   | 28142                                 | 13917                                               | 15776                                                           | 7238                                               | 13806                                               | 10458                                                           |
| Independ. Reflect.                   | 8765(R <sub>int</sub> = 0.0579)       | 5207 (R <sub>int</sub> = 0.0303)                    | 4170[R <sub>int</sub> = 0.0172]                                 | 5145 (R <sub>int</sub> = 0.0222)                   | 4355 (R <sub>int</sub> = 0.0701)                    | 7291 [R <sub>int</sub> = 0.0542]                                |
| Data/restraints/<br>parameters       | 8765/0/577                            | 5207/0/352                                          | 4170/0/259                                                      | 5145/0/298                                         | 4355/0/281                                          | 7291/0/418                                                      |
| Goof on F <sup>2</sup>               | 1.039                                 | 1.054                                               | 1.024                                                           | 1.091                                              | 1.000                                               | 0.973                                                           |
| R <sub>1</sub> , wR <sub>2</sub>     | 0.0572, 0.1293                        | 0.0527, 0.1365                                      | 0.0404, 0.0936                                                  | 0.0582, 0.1509                                     | 0.0521, 0.1053                                      | 0.0632, 0.1168                                                  |
| diff. Peak/hole (e Å <sup>-3</sup> ) | 0.574/-0.476                          | 0.761/-0.384                                        | 0.470/-0.207                                                    | 0.492/-0.366                                       | 0.492/-0.278                                        | 0.479/-0.466                                                    |

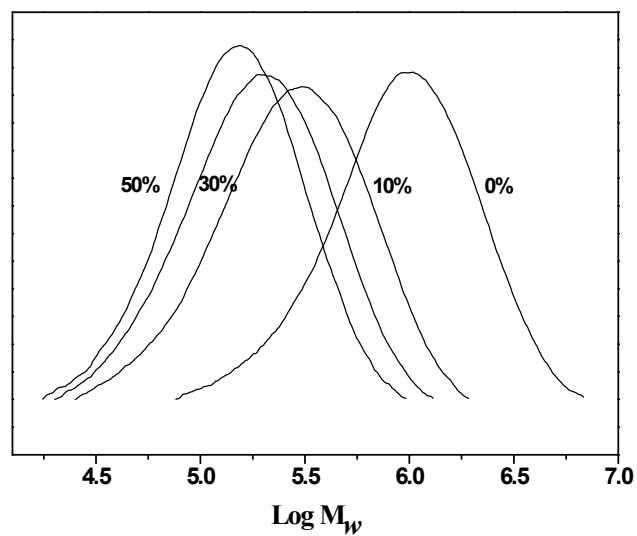

**Figure S1.** GPC spectrum of NB/NBC copolymers obtained (Entry 4-6 in Table 4 and Entry 3 in Table 1) by complex **2**

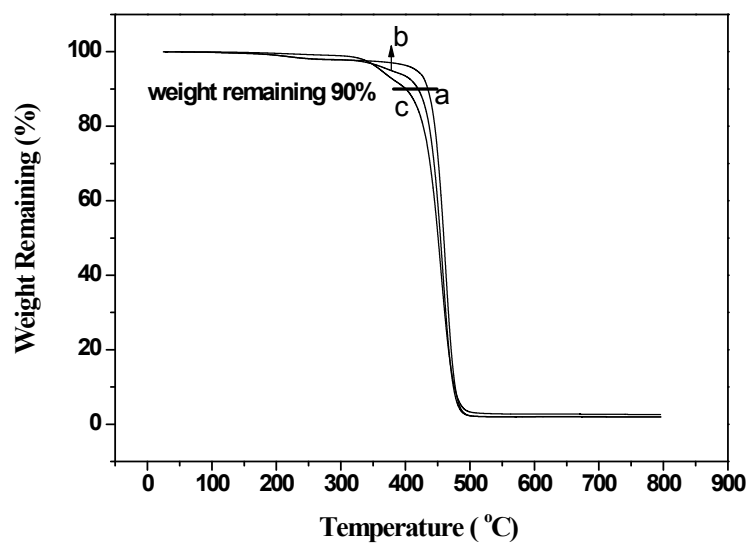

**Figure S2.** TGA curves of NB/NBA copolymers obtained (a: entry 3, Table 1, b: entry 3, Table 5, c: entry 4, Table 5) by complex **2**

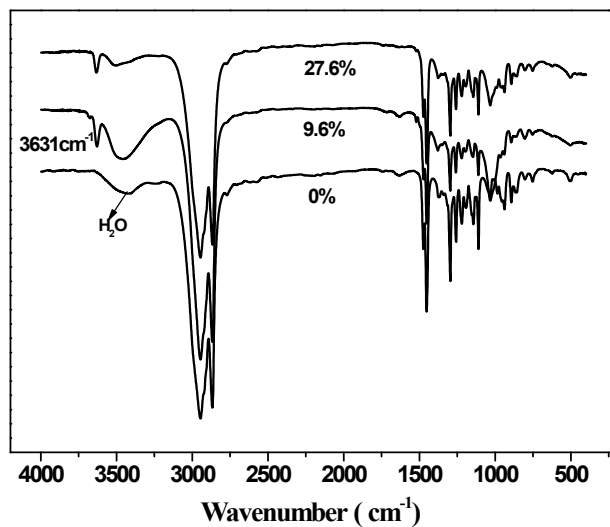

**Figure S3.** FTIR Spectra of NB/NBM copolymers obtained (entry 3,4 in Table 6 and entry 3 in Table 1 ) by complex **2**

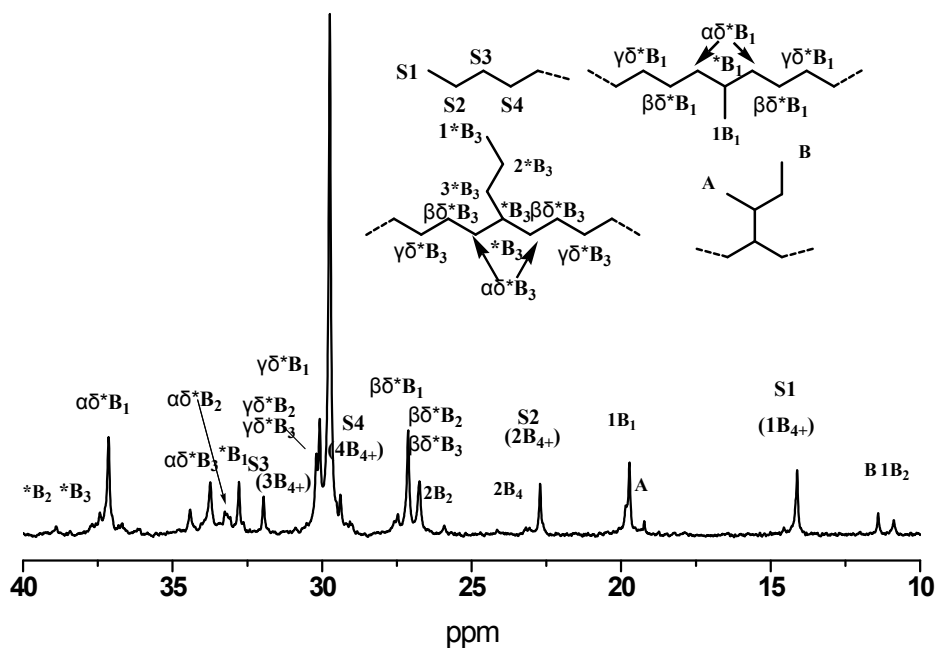

**Figure S4.** <sup>13</sup>C-NMR spectrum of the ethylene oligomers produced by salicylaldehyde nickel complex **5**

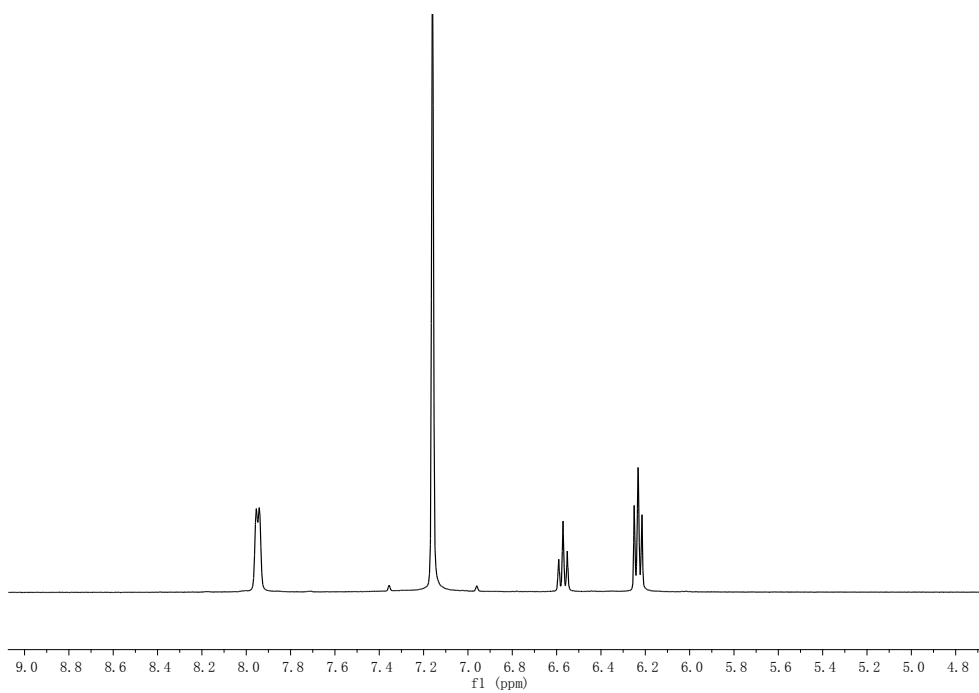

**Figure S5.**  $^1\text{H}$  NMR of pyridine/ $\text{B}(\text{C}_6\text{F}_5)_3$  adduct in  $\text{C}_6\text{D}_6$

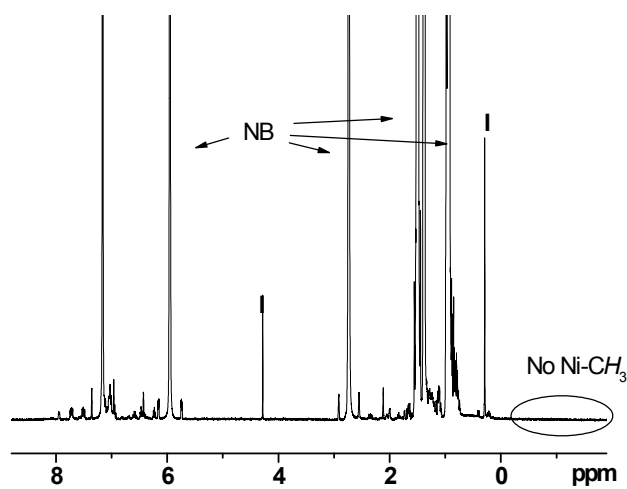

**Figure S6.**  $^1\text{H}$  NMR spectrum of the mixture of complex **2** + the first nickel methyl species reacts with 400 equiv norbornene. 'I' signifies impurities dichloromethane and silicon grease.

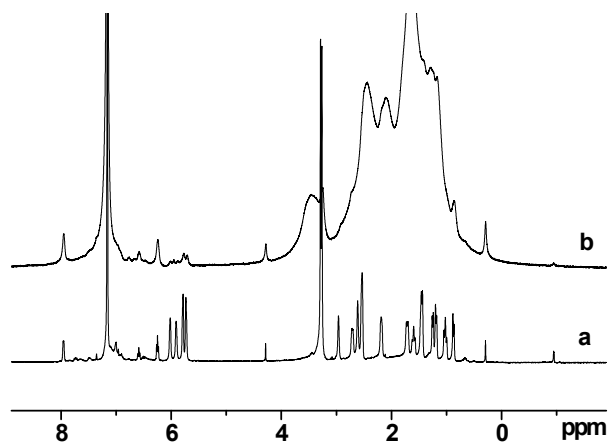

**Figure S7.** <sup>1</sup>H NMR spectra (in C<sub>6</sub>D<sub>6</sub> at room temperature) of complex **2** + 4 equiv B(C<sub>6</sub>F<sub>5</sub>)<sub>3</sub> + 20 equiv NBC (a), and (a) + 100 equiv NB after heated at 60 °C for 15 min (b).

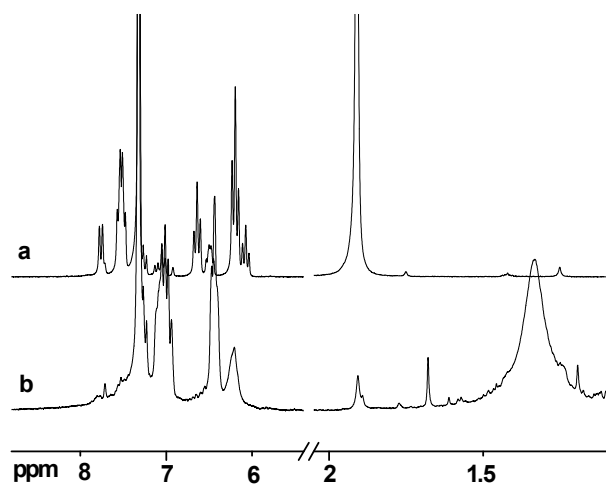

**Figure S8.** <sup>1</sup>H NMR spectra of a mixture of bisligated complex **4** with 6 equiv B(C<sub>6</sub>F<sub>5</sub>)<sub>3</sub> reacted at room temperature for 5 min (a), and heated (a) at 60 °C for 5 min (b).

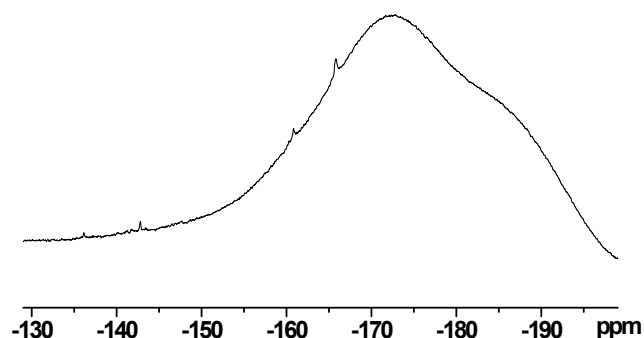

**Figure S9.**  $^{19}\text{F}$  NMR spectrum (in  $\text{CDCl}_3$  at room temperature, externally referenced to  $\text{C}_6\text{F}_6$ ) of the low molecular weight polynorbornene prepared in the presence of ethylene using complex **1**/ $\text{B}(\text{C}_6\text{F}_5)_3$  system.

#### Determination of reactivity ratios of NB and NBC using complex **1** + 4 equiv $\text{B}(\text{C}_6\text{F}_5)_3$

| Entry | Cat.<br>( $\mu\text{mol}$ ) | B/Ni<br>(mol/mol) | NB/NBC<br>(mol/mol) | time<br>(min) | Incorp.<br>(%) |
|-------|-----------------------------|-------------------|---------------------|---------------|----------------|
| 1     | 0.5                         | 4                 | 6/4                 | 10            | 10.7           |
| 2     | 0.5                         | 4                 | 5/5                 | 20            | 15.9           |
| 3     | 0.5                         | 4                 | 4/6                 | 20            | 23.1           |
| 4     | 0.5                         | 4                 | 3/7                 | 240           | 31.5           |

The activity ratios of NB and NBC were calculated by kelen-tüdös method using catalyst **1** and 4 equiv  $\text{B}(\text{C}_6\text{F}_5)_3$ , the conditions were controlled to keep the monomer conversion lower than 10%. Activity ratios  $r_{\text{NB}} = 5.84$  and  $r_{\text{NBC}} = 0.28$  were determined, pointing to a random copolymerization.

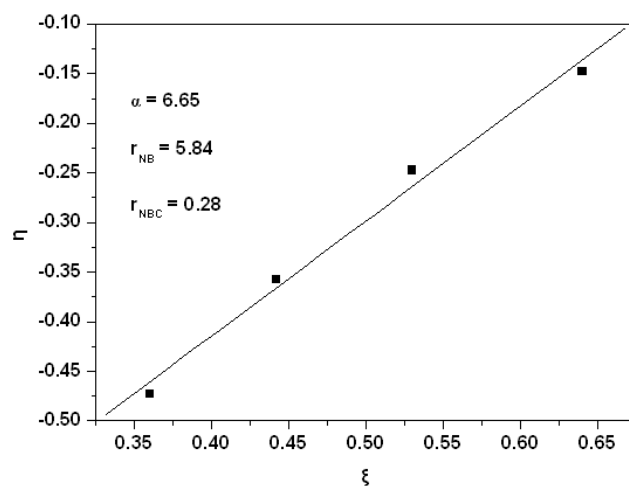

Supplement: c5dt00074b1.pdf [file c5dt00074b1.pdf]
